# Supplementary material
Source: Copernicus journal article supplement (doi:10.5194/angeo-44-353-2026)
Supplement: Supplementary file 1 [file angeo-44-353-2026-supplement.pdf]

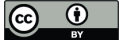

*Supplement of*

## **High-latitude MSTIDs over the EISCAT-3D site: solar activity and seasonal dependency**

**Rahul Rathi et al.**

*Correspondence to:* Adrian Grocott ([a.grocott@lancaster.ac.uk](mailto:a.grocott@lancaster.ac.uk))

The copyright of individual parts of the supplement might differ from the article licence.

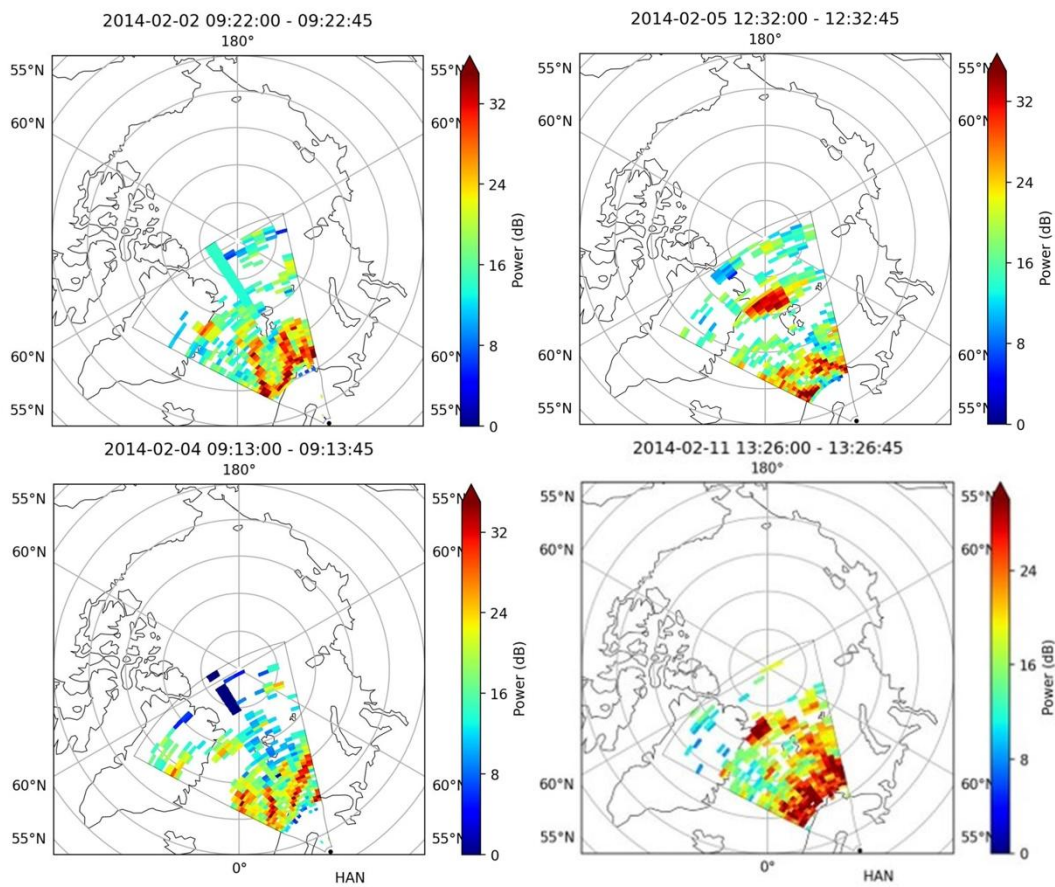

**Figure S1.** Shows few examples of MSTIDs with different orientations in the Hankasalmi radar FAN plots.
